# Supplementary material
Source: publisher figshare collection journal article supplement (https://gsapubs.figshare.com/articles/dataset/_/12539972)
Supplement: Supplementary file 1 [file 1]

Li, L., Fan, M., Davila, N., Jesmok, G., Mitsunaga, B., Tripathi, A., and Orme, D., 2018, Carbonate stable and clumped isotopic evidence for late Eocene moderate to high elevation of the east-central Tibetan Plateau and its geodynamic implications: GSA Bulletin, <https://doi.org/10.1130/B32060.1>.

## **Data Repository**

Table DR1. Clumped isotope raw data and calculated temperatures.

Figure DR1. Details and references for existing quantitative paleoelevation studies in Tibet.

# Carbonate stable and clumped isotopic evidence for late Eocene moderate to high elevation of the east-central Tibetan Plateau and its geodynamic implications

By Li et al.

Fig. DR1

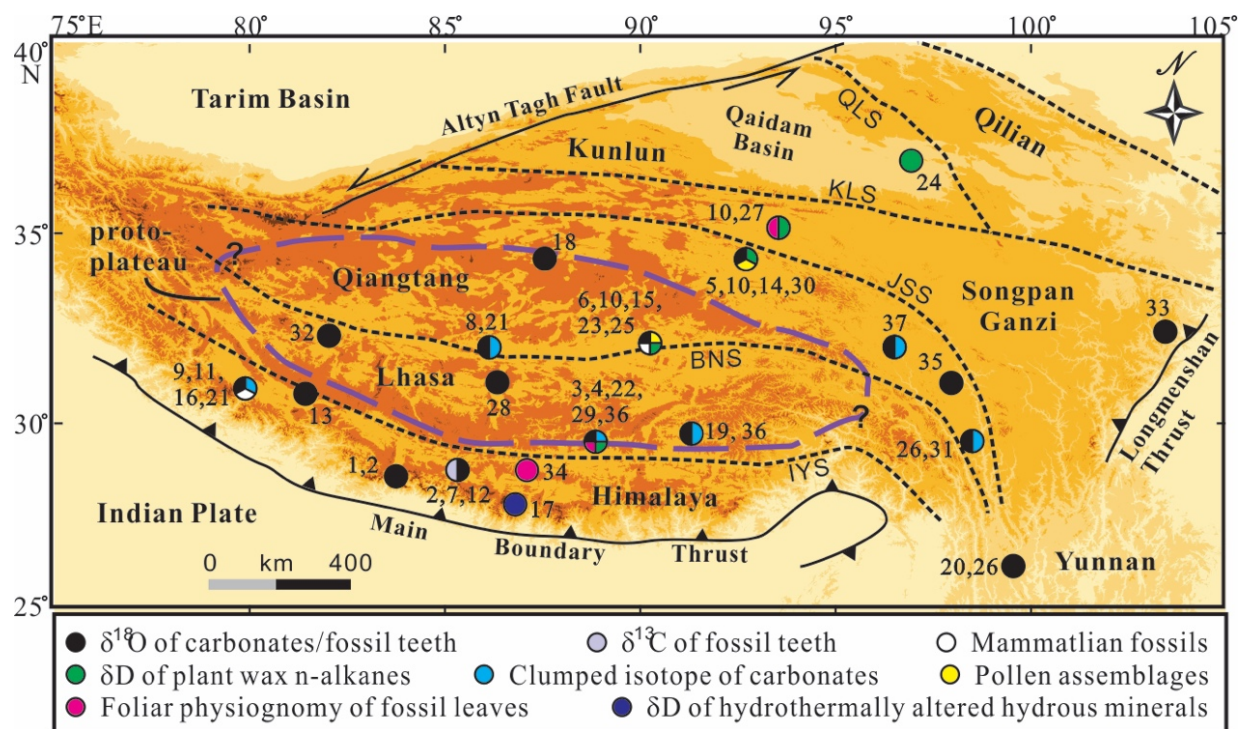

**Figure DR1.** Topographic map of the Tibetan Plateau showing locations with quantitative paleoelevation studies. Dotted lines are suture zones: BNS, Bangong–Nujiang suture; IYS, Indus–Yalong suture; JSS, Jinsha suture; KLS, Kunlun suture; QLS, Qilian suture. References: 1-Garzzone et al. (2000); 2-Rowley et al. (2001); 3-Spicer et al. (2003); 4-Currie et al. (2005); 5-Cyr et al. (2005); 6-Rowley and Currie (2006); 7-Wang et al. (2006); 8-DeCelles et al. (2007); 9-Murphy et al. (2009); 10-Polissar et al. (2009); 11-Saylor et al. (2009); 12-Xu et al. (2010); 13-DeCelles et al. (2011); 14-Quade et al. (2011); 15-Deng et al. (2012b); 16-Deng et al. (2012a); 17-Gébelin et al. (2013); 18-Xu et al. (2013); 19-Ding et al. (2014); 20-Hoke et al. (2014); 21-Huntington et al. (2014); 22-Khan et al. (2014); 23-Sun et al. (2014); 24-Zhuang et al. (2014); 25-Jia et al. (2015); 26-Li et al. (2015); 27-Sun et al. (2015); 28-Xu et al. (2015); 29-Currie et al. (2016); 30-Miao et al. (2016); 32-Wei et al. (2016); 33-Xu et al. (2017); 34-Ding et al. (2017); 35-Tang et al. (2017); 36-Ingalls et al. (2017); 37-This study.

## References:

- Currie, B. S., Polissar, P. J., Rowley, D. B., Ingalls, M., Li, S., Olack, G., and Freeman, K. H., 2016, Multiproxy paleoaltimetry of the Late Oligocene-Pliocene Oiyug Basin, southern Tibet: *American Journal of Science*, v. 316, no. 5, p. 401-436.
- Currie, B. S., Rowley, D. B., and Tabor, N. J., 2005, Middle Miocene paleoaltimetry of southern Tibet: Implications for the role of mantle thickening and delamination in the Himalayan orogen: *Geology*, v. 33, no. 3, p. 181-184.
- Cyr, A. J., Currie, B. S., and Rowley, D. B., 2005, Geochemical evaluation of Fenghuoshan Group lacustrine carbonates, north-central Tibet: implications for the paleoaltimetry of the Eocene Tibetan Plateau: *Journal of Geology*, v. 113, no. 5, p. 517-533.
- DeCelles, P., Kapp, P., Quade, J., and Gehrels, G., 2011, Oligocene–Miocene Kailas basin, southwestern Tibet: Record of postcollisional upper-plate extension in the Indus-Yarlung suture zone: *Geological Society of America Bulletin*, v. 123, no. 7-8, p. 1337-1362.
- DeCelles, P. G., Quade, J., Kapp, P., Fan, M., Dettman, D. L., and Ding, L., 2007, High and dry in central Tibet during the Late Oligocene: *Earth and Planetary Science Letters*, v. 253, no. 3-4, p. 389-401.
- Deng, T., Li, Q., Tseng, Z. J., Takeuchi, G. T., Wang, Y., Xie, G., Wang, S., Hou, S., and Wang, X., 2012a, Locomotive implication of a Pliocene three-toed horse skeleton from Tibet and its paleo-altimetry significance: *Proceedings of the National Academy of Sciences*, v. 109, no. 19, p. 7374-7378.
- Deng, T., Wang, S., Xie, G., Li, Q., Hou, S., and Sun, B., 2012b, A mammalian fossil from the Dingqing Formation in the Lunpola Basin, northern Tibet, and its relevance to age and paleo-altimetry: *Chinese Science Bulletin*, v. 57, no. 2-3, p. 261-269.
- Ding, L., Spicer, R., Yang, J., Xu, Q., Cai, Q., Li, S., Lai, Q., Wang, H., Spicer, T., and Yue, Y., 2017, Quantifying the rise of the Himalaya orogen and implications for the South Asian monsoon: *Geology*, p. G38583. 38581.
- Ding, L., Xu, Q., Yue, Y. H., Wang, H. Q., Cai, F. L., and Li, S., 2014, The Andean-type Gangdese Mountains: Paleoelevation record from the Paleocene–Eocene Linzhou Basin: *Earth and Planetary Science Letters*, v. 392, p. 250-264.
- Garzione, C. N., Dettman, D. L., Quade, J., DeCelles, P. G., and Butler, R. F., 2000, High times on the Tibetan Plateau: Paleoelevation of the Thakkhola graben, Nepal: *Geology*, v. 28, no. 4, p. 339-342.
- Gébelin, A., Mulch, A., Teyssier, C., Jessup, M. J., Law, R. D., and Brunel, M., 2013, The Miocene elevation of Mount Everest: *Geology*, v. 41, no. 7, p. 799-802.
- Hoke, G. D., Liu-Zeng, J., Hren, M., Wissink, G. K., and Garzione, C. N., 2014, Stable isotopes reveal high southeast Tibetan Plateau margin since the Paleogene: *Earth and Planetary Science Letters*, v. 394, p. 270-278.
- Huntington, K. W., Saylor, J., Quade, J., and Hudson, A. M., 2014, High late Miocene–Pliocene elevation of the Zhada Basin, southwestern Tibetan Plateau, from carbonate clumped isotope thermometry: *Geological Society of America Bulletin*, v. 127, no. 1-2, p. 181-199.
- Ingalls, M., Rowley, D. B., Olack, G., Currie, B. S., Li, S. Y., Schmidt, J. L., Tremblay, M. M., Polissar, P. J., Shuster, D. L., Ding, L., and Colman, A. S., 2017, Paleocene to Pliocene low-latitude, high-elevation basins of southern Tibet: Implications for tectonic models of India-Asia collision, Cenozoic climate, and geochemical weathering: *Geological Society of America Bulletin*, v. 130, no. 1-2, p. 307-330.

- Jia, G., Bai, Y., Ma, Y., Sun, J., and Peng, P. a., 2015, Paleoelevation of Tibetan Lunpola basin in the Oligocene–Miocene transition estimated from leaf wax lipid dual isotopes: *Global and Planetary Change*, v. 126, p. 14-22.
- Khan, M. A., Spicer, R. A., Bera, S., Ghosh, R., Yang, J., Spicer, T. E., Guo, S.-x., Su, T., Jacques, F., and Grote, P. J., 2014, Miocene to Pleistocene floras and climate of the Eastern Himalayan Siwaliks, and new palaeoelevation estimates for the Namling–Oiyug Basin, Tibet: *Global and Planetary Change*, v. 113, p. 1-10.
- Li, S., Currie, B. S., Rowley, D. B., and Ingalls, M., 2015, Cenozoic paleoaltimetry of the SE margin of the Tibetan Plateau: Constraints on the tectonic evolution of the region: *Earth and Planetary Science Letters*, v. 432, p. 415-424.
- Miao, Y. F., Wu, F. L., Chang, H., Fang, X. M., Deng, T., Sun, J. M., and Jin, C. S., 2016, A Late-Eocene palynological record from the Hoh Xil Basin, northern Tibetan Plateau, and its implications for stratigraphic age, paleoclimate and paleoelevation: *Gondwana Research*, v. 31, p. 241-252.
- Murphy, M. A., Saylor, J. E., and Ding, L., 2009, Late Miocene topographic inversion in southwest Tibet based on integrated paleoelevation reconstructions and structural history: *Earth and Planetary Science Letters*, v. 282, no. 1-4, p. 1-9.
- Polissar, P. J., Freeman, K. H., Rowley, D. B., McInerney, F. A., and Currie, B. S., 2009, Paleoaltimetry of the Tibetan Plateau from D/H ratios of lipid biomarkers: *Earth and Planetary Science Letters*, v. 287, no. 1-2, p. 64-76.
- Quade, J., Breecker, D. O., Daeron, M., and Eiler, J., 2011, The paleoaltimetry of Tibet: An isotopic perspective: *American Journal of Science*, v. 311, no. 2, p. 77-115.
- Rowley, D. B., and Currie, B. S., 2006, Palaeo-altimetry of the late Eocene to Miocene Lunpola basin, central Tibet: *Nature*, v. 439, no. 7077, p. 677-681.
- Rowley, D. B., Pierrehumbert, R. T., and Currie, B. S., 2001, A new approach to stable isotope-based paleoaltimetry: implications for paleoaltimetry and paleohypsometry of the High Himalaya since the Late Miocene: *Earth and Planetary Science Letters*, v. 188, no. 1-2, p. 253-268.
- Saylor, J., Quade, J., Dettman, D., DeCelles, P., Kapp, P., and Ding, L., 2009, The late Miocene through present paleoelevation history of southwestern Tibet: *American Journal of Science*, v. 309, no. 1, p. 1-42.
- Spicer, R. A., Harris, N. B. W., Widdowson, M., Herman, A. B., Guo, S., Valdes, P. J., Wolfe, J. A., and Kelley, S. P., 2003, Constant elevation of southern Tibet over the past 15 million years: *Nature*, v. 421, no. 6923, p. 622-624.
- Sun, B., Wang, Y. F., Li, C. S., Yang, J., Li, J. F., Li, Y. L., Deng, T., Wang, S. Q., Zhao, M., Spicer, R. A., Ferguson, D. K., and Mehrotra, R. C., 2015, Early Miocene elevation in northern Tibet estimated by palaeobotanical evidence: *Scientific reports*, v. 5, doi:10.1038/srep10379.
- Sun, J. M., Xu, Q. H., Liu, W. M., Zhang, Z. Q., Xue, L., and Zhao, P., 2014, Palynological evidence for the latest Oligocene-early Miocene paleoelevation estimate in the Lunpola Basin, central Tibet: *Palaeogeography, Palaeoclimatology, Palaeoecology*, v. 399, p. 21-30.
- Tang, M., Liu-Zeng, J., Hoke, G. D., Xu, Q., Wang, W., Li, Z., Zhang, J., and Wang, W., 2017, Paleoelevation reconstruction of the Paleocene-Eocene Gonjo basin, SE-central Tibet: *Tectonophysics*, v. 712-713, p. 170-181.

- Wang, Y., Deng, T., and Biasatti, D., 2006, Ancient diets indicate significant uplift of southern Tibet after ca. 7 Ma: *Geology*, v. 34, no. 4, p. 309-312.
- Wei, Y., Zhang, K., Garzzone, C. N., Xu, Y., Song, B., and Ji, J., 2016, Low palaeoelevation of the northern Lhasa terrane during late Eocene: Fossil foraminifera and stable isotope evidence from the Gerze Basin: *Scientific reports*, v. 6, doi: 10.1038/srep27508.
- Xu, Q., Ding, L., Hetzel, R., Yue, Y., and Rades, E. F., 2015, Low elevation of the northern Lhasa terrane in the Eocene: implications for relief development in south Tibet: *Terra Nova*, v. 27, no. 6, p. 458-466.
- Xu, Q., Ding, L., Zhang, L., Yang, D., Cai, F., Lai, Q., Liu, J., and Shi, R., 2010, Stable isotopes of modern herbivore tooth enamel in the Tibetan Plateau: Implications for paleoelevation reconstructions: *Chinese Science Bulletin*, v. 55, no. 1, p. 45-54.
- Xu, Q., Ding, L., Zhang, L. Y., Cai, F. L., Lai, Q. Z., Yang, D., and Liu-Zeng, J., 2013, Paleogene high elevations in the Qiangtang Terrane, central Tibetan Plateau: *Earth and Planetary Science Letters*, v. 362, p. 31-42.
- Xu, Q., Liu, X., and Ding, L., 2017, Miocene high-elevation landscape of the eastern Tibetan Plateau: *Geochemistry, Geophysics, Geosystems*, v. 17, doi:10.1002/2016GC006437.
- Zhuang, G. S., Brabdon, M. T., Pagani, M., and Kirishnan, S., 2014, Leaf wax stable isotopes from Northern Tibetan Plateau: Implications for uplift and climate since 15 Ma: *Earth and Planetary Science Letters*, v. 390, p. 186-198.
